# Supplementary material
Source: PubMed Central journal article supplement (PMC6643743)
Supplement: ao8b01566_si_001.pdf [file ao8b01566_si_001.pdf]

## Supporting Information

### **Nano-scaled surface modification of polydimethylsiloxane using carbon nanotubes for enhanced oil and organic solvent absorption**

Chong Cheen Ong<sup>†</sup>, Satisvar Sundera Murthe<sup>†</sup>, Norani Muti Mohamed<sup>†,‡</sup>,  
Veeradasan Perumal<sup>†,¶</sup>, Mohamed Shuaib Mohamed Saheed<sup>†,‡,\*</sup>

<sup>†</sup>Department of Fundamental & Applied Sciences, Universiti Teknologi PETRONAS, 32610  
Seri Iskandar, Perak Darul Ridzuan, Malaysia.

<sup>‡</sup>Centre of Innovative Nanostructures & Nanodevices (COINN), Universiti Teknologi  
PETRONAS, 32610 Seri Iskandar, Perak Darul Ridzuan, Malaysia.

<sup>¶</sup>Department of Mechanical Engineering, Universiti Teknologi PETRONAS, 32610  
Seri Iskandar, Perak Darul Ridzuan, Malaysia.

\*Corresponding Author

Email: [shuaib.saheed@utp.edu.my](mailto:shuaib.saheed@utp.edu.my)

Telephone: +605-3687653

## FESEM analysis

Figure S1 shows the FESEM analysis of various concentration of CNT, 0.2mg/ml (PC0.2), 0.4mg/ml (PC0.4), 0.6mg/ml (PC0.6), 0.8mg/ml (PC0.8mg/ml) and 1mg/ml (PC1) disperse in the sugar mixture before adding PDMS pre-polymer.

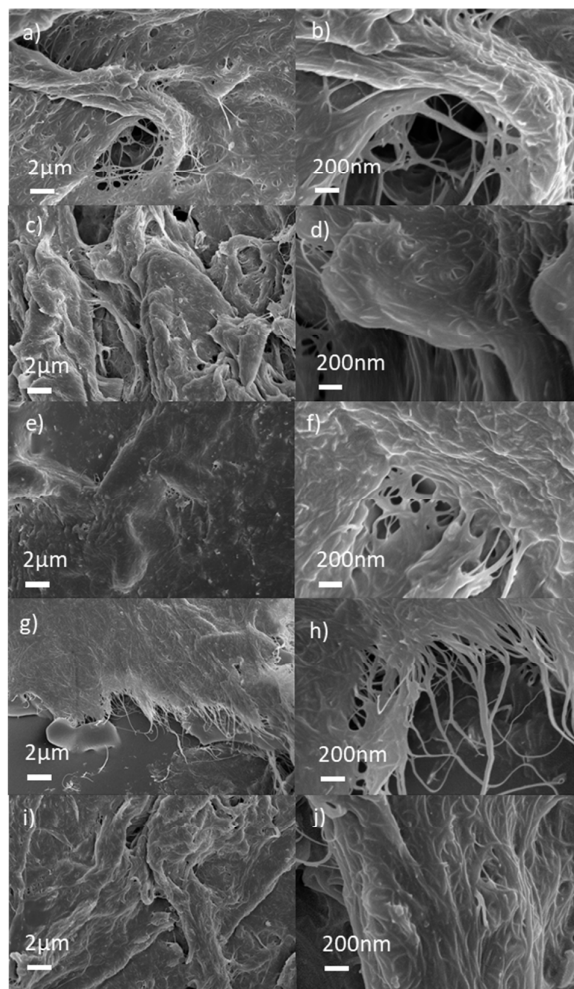

**Figure S1** FESEM image of cross-section of (a,b) PC0.2 (c,d) PC0.4 (e,f) PC0.6 (g,h) PC0.8 (i,j) PC1

## Surface Wetting Mechanism

Surface roughness is essential part to improve hydrophobicity can be proven by;

Wenzel's equation.

$$\cos\theta_{rough} = r\cos\theta_{flat} \quad (1)$$

Cassie-Baxter equation

$$\cos\theta_{rough} = \phi_s\cos\theta_{flat} - (1 - \phi_s) \quad (2)$$

where  $r$  is surface roughness factor (actual surface area: geometrical one) and  $\phi_s$  is fraction of solid surface that contacts water. Knowing the fundamental of surface roughness influence greatly in developing highly hydrophobic surface, nanostructure CNTs was used to enhance the surface asperities in a nano-scaled structure.

## XPS Analysis

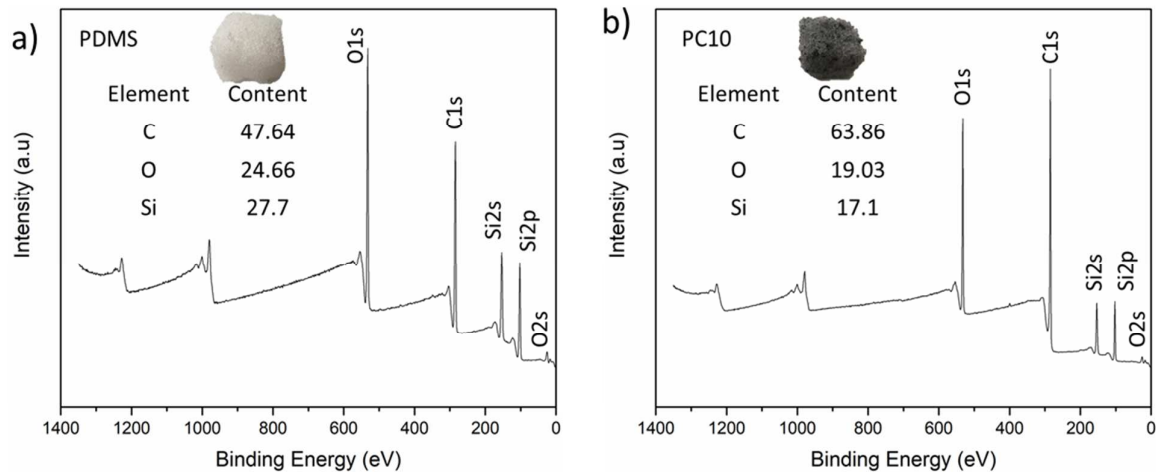

**Figure S2:** a) XPS spectrum of PDMS b) XPS spectrum of PC10

## Contact Angle and Young's Equation

To determine whether the material have both property, water contact angle (CA)  $\theta$  was used which can be calculated by Young's equation.

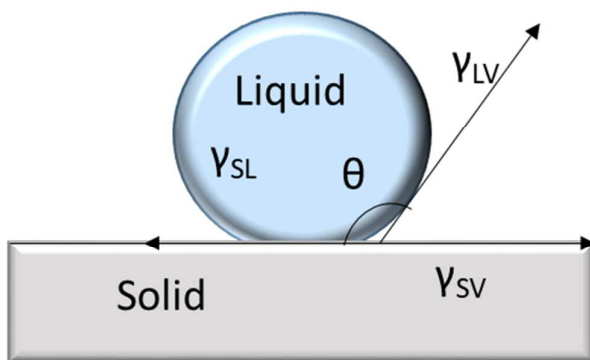

**Figure S3:** Schematic illustration of liquid on solid surface

$$\cos \theta = \frac{\gamma_{SV} - \gamma_{SL}}{\gamma_{LV}} \quad (3)$$

Where  $\gamma_{SV}$  is interfacial tension between solid and vapor,  $\gamma_{SL}$  is interfacial tension between solid and liquid, and  $\gamma_{LV}$  is interfacial tension between liquid and vapour. From this equation, for an ideal absorbent to have high CA, surface energy of the solid need to be lowered.

| <b>Table S1: Relation of water contact angle to surface hydrophobicity</b> |                                |
|----------------------------------------------------------------------------|--------------------------------|
| <b>Water Contact Angle</b>                                                 | <b>Hydrophobic/Hydrophilic</b> |
| <b>&lt;90°</b>                                                             | Hydrophilic                    |
| <b>90° to 150°</b>                                                         | Hydrophobic                    |
| <b>&gt;150°</b>                                                            | Superhydrophobic               |

---

If contact angle is less than  $90^\circ$ , the surface is considered hydrophilic. For hydrophobic surface, the contact angle should be between  $90^\circ$  to  $150^\circ$ . To improve hydrophobicity, surface roughness of material can be manipulated. This is because surface roughness and low surface energy material can create an artificial hydrophobic surfaces<sup>1</sup>.

## Comparison of Performance

**Table S2:** Comparison of absorbent material performance of previous work

| Absorbent Material                                        | %     | Absorbate                                                                                                                                                             | Authors/Year               |
|-----------------------------------------------------------|-------|-----------------------------------------------------------------------------------------------------------------------------------------------------------------------|----------------------------|
| Carbon nanotube sponges <sup>2</sup>                      | 10000 | Mineral Oil<br>Vegetable Oil<br>Diesel Oil<br>Octane<br>Ethyl Acetate                                                                                                 | Gui <i>et al.</i> 2011     |
| Polydimethylsiloxane<br>Sponge <sup>3</sup>               | 1100  | Chloroform<br>Dichloroform<br>1,2-dichlorobenzene<br>Silicone Oil<br>Motor Oil<br>N,N-dimethylmethane<br>Toluene<br>Transformer Oil<br>Methanol<br>Ethanol<br>Acetone | Choi <i>et al.</i><br>2011 |
| Magnetic Carbon<br>nanotubes <sup>4</sup>                 | 5600  | Diesel Oil<br>Gasoline                                                                                                                                                | Gui <i>et al.</i> 2013     |
| Carbon Nanotubes-<br>Graphene Hybrid Aerogel <sup>5</sup> | 13000 | Pump Oil<br>Vegetable Oil<br>Diesel<br>Gasoline<br>Ethyl Acetate                                                                                                      | Hu <i>et al.</i> 2014      |
| Graphene coated cotton <sup>6</sup>                       | 500   | Chloroform<br>Hexane<br>Acetone<br>Ethanol<br>Methanol<br>Pump Oil<br>Rap Oil<br>Ethyl Acetate                                                                        | Ge <i>et al.</i> 2014      |
| Hard Template PDMS <sup>7</sup>                           | 1301  | Dichloromethane<br>n-Hexane<br>Petrol<br>Diesel Oil<br>Toluene                                                                                                        | Zhao <i>et al.</i><br>2014 |

|                                                                                                    |       |                                                                                                                                                    |                         |
|----------------------------------------------------------------------------------------------------|-------|----------------------------------------------------------------------------------------------------------------------------------------------------|-------------------------|
| Functionalized Graphene Aerogel <sup>8</sup>                                                       | 10000 | Chlorobenzene<br>Chloroform<br>Dimethylformamide<br>Toluene<br>Pump Oil<br>Tetrahydrofuran<br>Methanol<br>Ethanol<br>Acetone                       | Hong <i>et al.</i> 2015 |
| Electrospun carbon-silica nanofiber sponge <sup>9</sup>                                            | 14000 | Toluene<br>Tetrahydrofuran<br>Dimethylformamide<br>Isopropyl Alcohol<br>Benzyl Alcohol<br>Isooctane<br>Pump Oil<br>Silicone Oil<br>Olive Oil       | Tai <i>et al.</i> 2015  |
| Polyurethane@Fe <sub>3</sub> O <sub>4</sub> @SiO <sub>2</sub> @fluoropolymer sponges <sup>10</sup> | 4450  | Petrol<br>Crude Oil<br>Toluene<br>Soybean Oil<br>n-hexane<br>ethanol<br>Tetrachloromethane<br>Chloroform<br>Petroleum ether<br>1,2-dichlorobenzene | Wu <i>et al.</i> 2015   |
| Fe <sub>3</sub> O <sub>4</sub> nanoparticles decorated 3D graphene aerogels <sup>11</sup>          | 2000  | Gasoline<br>Engine Oil<br>Cyclohexane<br>Octane<br>Xylene                                                                                          | Li <i>et al.</i> 2016   |
| Nitrogen-doped graphene sponge <sup>12</sup>                                                       | 20000 | Diesel<br>Kerosene<br>Engine Oil<br>Vegetable Oil<br>Gasoline                                                                                      | Yang <i>et al.</i> 2016 |
| Porous and Wrinkle Graphene <sup>13</sup>                                                          | 5300  | Pump Oil<br>Bean Oil<br>Lubricating Oil<br>Olive Oil<br>Ethanol                                                                                    | Fu <i>et al.</i> 2016   |

|                         |      |                                                                                                                                 |                           |
|-------------------------|------|---------------------------------------------------------------------------------------------------------------------------------|---------------------------|
| PDMS-CNT (current work) | 3100 | Chloroform<br>Dichloromethane<br>Chlorobenzene<br>Vegetable Oil<br>Engine Oil<br>Toluene<br>Diesel Oil<br>Petrol<br>Cyclohexane | Ong <i>et al.</i><br>2018 |
|-------------------------|------|---------------------------------------------------------------------------------------------------------------------------------|---------------------------|

## REFERENCE

- (1) Gupta, S.; Tai, N.-H. Carbon materials as oil sorbents: a review on the synthesis and performance *J. Mater. Chem. A* **2016**, 4 (5), 1550–1565.
- (2) Gui, X.; Li, H.; Wang, K.; Wei, J.; Jia, Y.; Li, Z.; Fan, L.; Cao, A.; Zhu, H.; Wu, D. Recyclable carbon nanotube sponges for oil absorption *Acta Mater.* **2011**, 59 (12), 4798–4804.
- (3) Choi, S.-J.; Kwon, T.-H.; Im, H.; Moon, D.-I.; Baek, D. J.; Seol, M.-L.; Duarte, J. P.; Choi, Y.-K. A Polydimethylsiloxane (PDMS) Sponge for the Selective Absorption of Oil from Water *ACS Appl. Mater. Interfaces* **2011**, 3 (12), 4552–4556.
- (4) Gui, X.; Zeng, Z.; Lin, Z.; Gan, Q.; Xiang, R.; Zhu, Y.; Cao, A.; Tang, Z. Magnetic and highly recyclable macroporous carbon nanotubes for spilled oil sorption and separation *ACS Appl. Mater. Interfaces* **2013**, 5 (12), 5845–5850.
- (5) Hu, H.; Zhao, Z.; Gogotsi, Y.; Qiu, J. Compressible Carbon Nanotube-Graphene Hybrid Aerogels with Superhydrophobicity and Superoleophilicity for Oil Sorption *Environ. Sci. Technol. Lett.* **2014**, 1 (3), 214–220.
- (6) Ge, B.; Zhang, Z.; Zhu, X.; Men, X.; Zhou, X.; Xue, Q. A graphene coated cotton for oil/water separation *Compos. Sci. Technol.* **2014**, 102, 100–105.

- (7) Zhao, X.; Li, L.; Li, B.; Zhang, J.; Wang, A. Durable superhydrophobic/superoleophilic PDMS sponges and their applications in selective oil absorption and in plugging oil leakages *J. Mater. Chem. A Mater. energy Sustain.* **2014**, 2, 18281–18287.
- (8) Hong, J. Y.; Sohn, E. H.; Park, S.; Park, H. S. Highly-efficient and recyclable oil absorbing performance of functionalized graphene aerogel *Chem. Eng. J.* **2015**, 269, 229–235.
- (9) Tai, M. H.; Gao, P.; Yong, B.; Tan, L.; Sun, D. D.; Leckie, J. O. A self-assembled superhydrophobic electrospun carbon-silica nanofiber sponge for selective removal and recovery of oils and organic solvents *Chem. Eur. J.* **2014**, 21(14), 5395-5402.
- (10) Wu, L.; Li, L.; Li, B.; Zhang, J.; Wang, A. Magnetic, durable, and superhydrophobic polyurethane@Fe<sub>3</sub>O<sub>4</sub>@SiO<sub>2</sub>@fluoropolymer sponges for selective oil absorption and oil/water separation *ACS Appl. Mater. Interfaces* **2015**, 7 (8), 4936–4946.
- (11) Li, Y.; Zhang, R.; Tian, X.; Yang, C.; Zhou, Z. Facile synthesis of Fe<sub>3</sub>O<sub>4</sub> nanoparticles decorated on 3D graphene aerogels as broad-spectrum sorbents for water treatment *Appl. Surf. Sci.* **2016**, 369, 11–18.
- (12) Yang, W.; Gao, H.; Zhao, Y.; Bi, K.; Li, X. Facile preparation of nitrogen-doped graphene sponge as a highly efficient oil absorption material *Mater. Lett.* **2016**, 178, 95–99.
- (13) Fu, C.; Wang, Z.; Liu, J.; Jiang, H.; Li, G.; Zhi, C. Large scale fabrication of graphene for oil and organic solvent absorption *Prog. Nat. Sci. Mater. Int.* **2016**, 26 (3), 319–323.
